# Supplementary material for: Graphene oxide-functionalized nanofibre composite matrices to enhance differentiation of hippocampal neuronal cells
Source: Royal Society of Chemistry journal article supplement (doi:10.1039/d0ma00733a), 2020-01-01
Supplement: d0ma00733a1.pdf [file d0ma00733a1.pdf]

**[Electronic Supplementary Information]**

**Graphene oxide-functionalized nanofibre composite matrices to  
enhance differentiation of hippocampal neuronal cells**

Moon Sung Kang,<sup>†a</sup> Jong Ho Lee,<sup>†b</sup> Su-Jin Song,<sup>a</sup> Dong-Myeong Shin,<sup>c</sup> Jun-Hyeog Jang,<sup>d</sup>

Suong-Hyu Hyon,<sup>e</sup> Suck Won Hong,<sup>\*a</sup> Jong Hun Lee<sup>\*f</sup> and Dong-Wook Han<sup>\*a</sup>

*<sup>a</sup> Department of Cogno-Mechatronics Engineering, College of Nanoscience & Nanotechnology,  
Pusan National University, Busan 46241, South Korea*

*<sup>b</sup> Daan Korea Corporation, Seoul 06252, South Korea*

*<sup>c</sup> Department of Mechanical Engineering, The University of Hong Kong, Hong Kong 999077, China*

*<sup>d</sup> Department of Biochemistry & IRIMS, Inha University School of Medicine, Incheon 22212, South  
Korea*

*<sup>e</sup> The Joint Graduate School of Veterinary Medicine, Kagoshima University, Kagoshima 890-8580,  
Japan*

*<sup>f</sup> Department of Food Science and Biotechnology, Gachon University, Seongnam 13120, South Korea*

<sup>†</sup> Equal contribution.

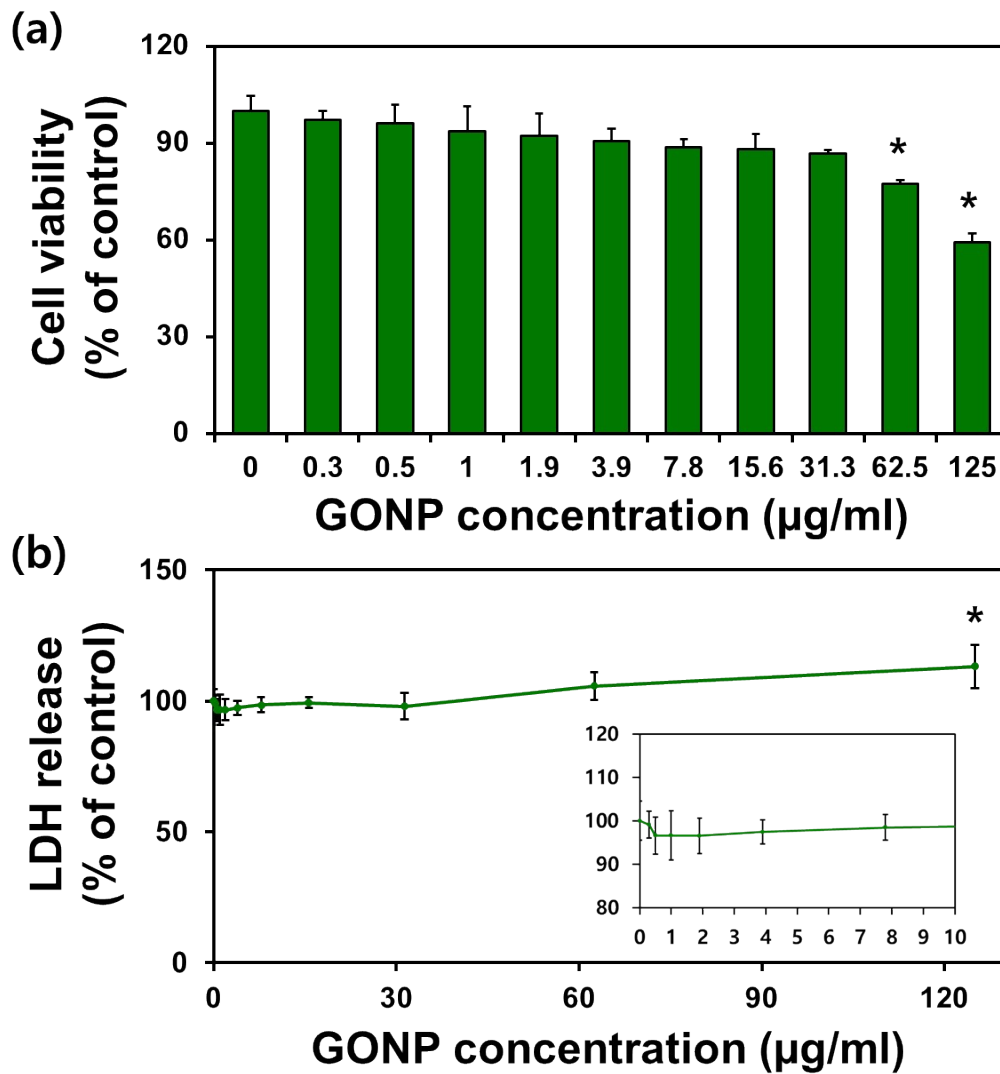

**Figure S1.** Cytotoxicity profiles of GONPs against HT22 hippocampal neuronal cells determined by (a) CCK-8 and (b) lactate dehydrogenase (LDH) assays. An asterisk (\*) denotes a significant difference compared to the control,  $p < 0.05$ .

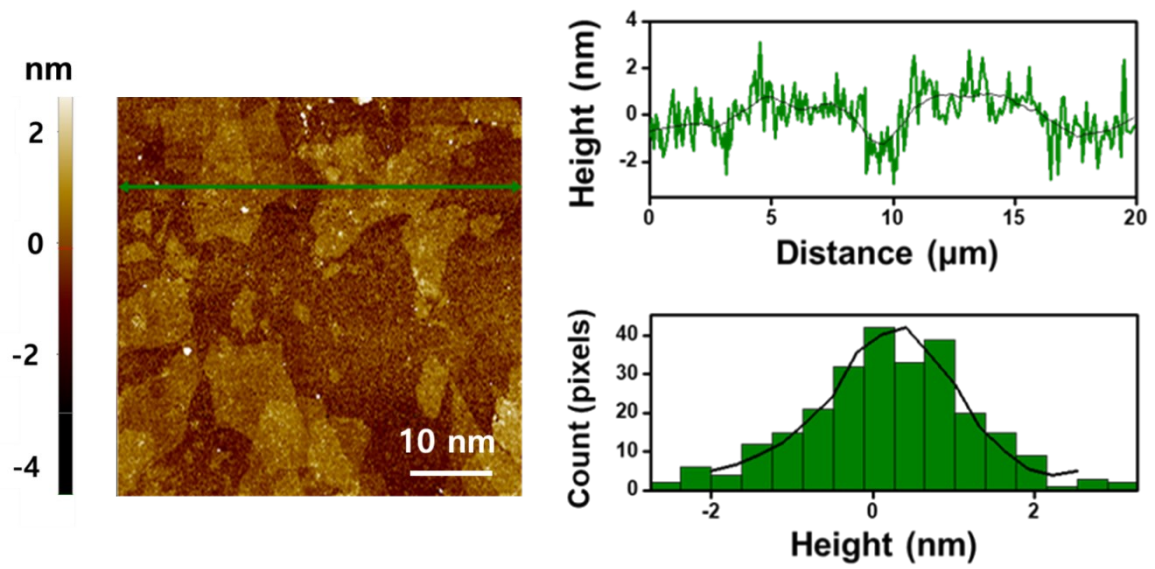

**Figure S2.** AFM image and height profile of GONPs.

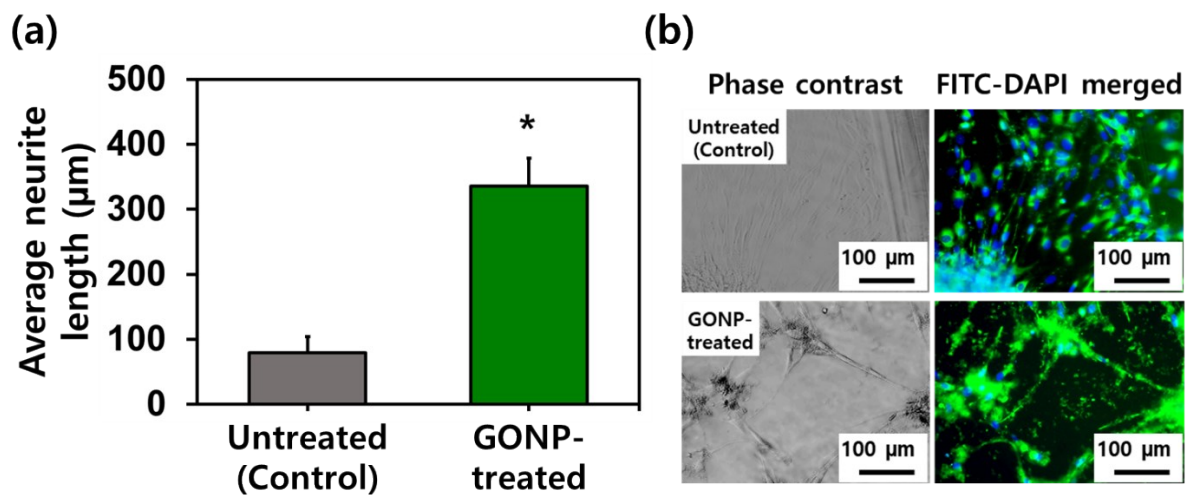

**Figure S3.** Immunocytochemical analysis. (a) Average neurite length and (b) confocal micrograph of HT22 hippocampal neuronal cells treated with or without 10 µg/mL GONPs. Fluorescence denotes the nucleus (blue from DAPI) and neurofilaments heavy chain (green from FITC), respectively. All images shown in this figure are representative of six independent experiments with similar results. An asterisk (\*) denotes a significant difference compared to the untreated cells (control),  $p < 0.05$ .
